# Supplementary material for: Involvement of AoMdr1 in the Regulation of the Fluconazole Resistance, Mycelial Fusion, Conidiation, and Trap Formation of Arthrobotrys oligospora
Source: MDPI journal article supplement (doi:10.3390/microorganisms11061612), 2023-06-19
Supplement: s1 [file s1]

Supporting Information

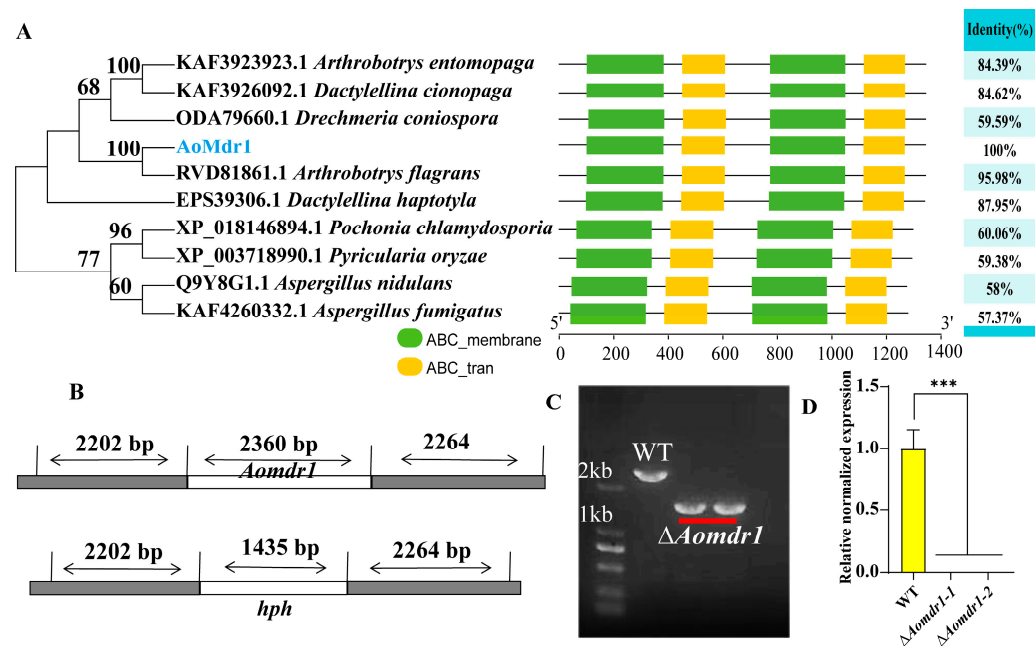

**Figure S1.** Phylogenetic analysis and validation of *Aomdr1* knockout strain. (A) Phylogenetic and structure domain analyses of Mdr1 orthologs from different fungi. (B) Diagram of the principle of homologous recombination. (C-D) Validation of knockout strains by PCR and RT-qPCR. In PCR analysis, the targeted bands of the *Aomdr1* knockout strains were marked with red lines. Asterisks indicate significant differences between the  $\Delta Aomdr1$  mutant and WT strains (Tukey's HSD, \*\*\* $p < 0.01$ ).

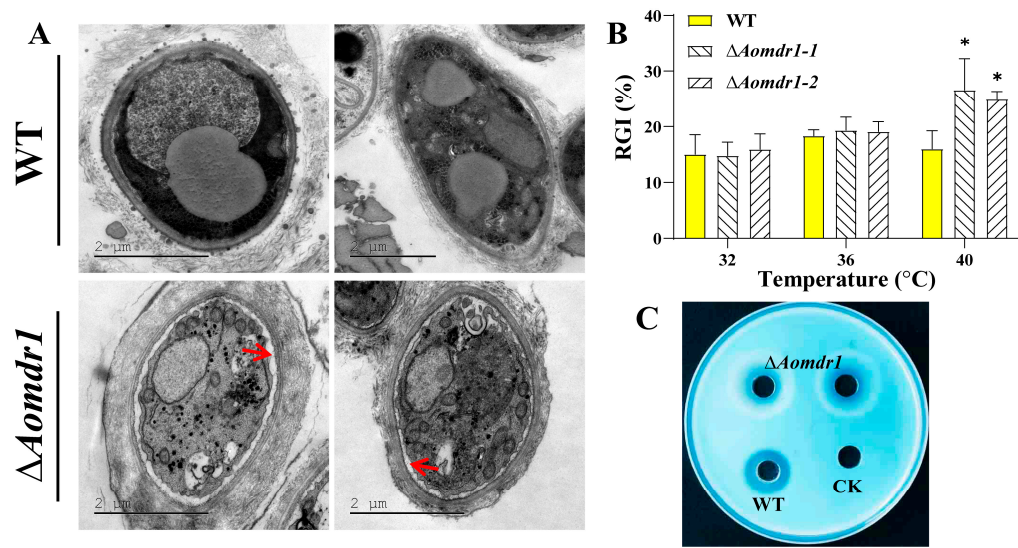

**Figure S2.** Comparison of plasma-wall separation, stress response to heat shock, and extracellular proteolytic activities of WT and mutant strains. (A) Plasma-wall separation observed by TEM. (B) Heat sensitivity of mutant strains. Asterisks indicate significant differences between the  $\Delta Aomdr1$  mutant and WT strains (Tukey HSD, \* $p < 0.05$ ). (C) Comparison of the extracellular protease activities of WT and mutant strains. CK, the PD broth was used as a control sample.

**Table S1.** List of primers used for gene manipulation in this study.

| Primers   | Primer sequence                                      | Application               |
|-----------|------------------------------------------------------|---------------------------|
| AoMdr1-5F | F-GTAACGCCAGGGTTTCCAGTCACGACGTACTGGAGTTACGTGATGCTGG  | 5' Homologous arm         |
| AoMdr1-5R | R-ATCCACTTAACGTTACTGAAATCTCCAACCTCGTACCCAAGCTTTCAGGA |                           |
| AoMdr1-3F | F-CTCCTTCAATATCATCTTCTGTCTCCGACTGGCGGTCTGTCTCCTGATA  | 3' Homologous arm         |
| AoMdr1-3R | R-GCGGATAACAATTCACACAGGAAACAGCTGTGAATGATGTCTGTCGAGT  |                           |
| AoMdr1-PF | F-TCCTGAAAGCTTGGGTACGA                               | Transformant verification |
| AoMdr1-PR | R-TATCAGGAGACAGACCGCCA                               |                           |
| AoMdr1-RF | F-ATGATATACATTGCAGACCA                               | RT-PCR verification       |
| AoMdr1-RR | R-CGTTCAATACAGCCTTTGGA                               |                           |
| Hph-F     | F-GTTGGAGATTTCAGTAACGTTAAGTGGAT                      | Amplify the <i>hph</i>    |
| Hph-R     | R-GTCGGAGACAGAAGATGATATTGAAGGAGC                     |                           |

**Table S2.** Information of the plasmids used in this study.

| Plasmids | Selection marker | Application                              |
|----------|------------------|------------------------------------------|
| pSCN44   | Hph <sup>+</sup> | For hygromycin resistance                |
| pRS426   | Amp <sup>+</sup> | For constructing the disruption fragment |
